# Supplementary material for: Length-scale dependence of protein hydration-shell density
Source: Royal Society of Chemistry journal article supplement (doi:10.1039/c9cp06214a), 2020-01-01
Supplement: c9cp06214a1.pdf [file c9cp06214a1.pdf]

# Length-scale dependence of protein hydration-shell density

Akash Deep Biswas,<sup>†,‡</sup> Vincenzo Barone,<sup>†,¶</sup> Andrea Amadei,<sup>§</sup> and Isabella  
Daidone<sup>\*,‡</sup>

<sup>†</sup>*Scuola Normale Superiore di Pisa, Piazza dei Cavalieri 7, Pisa, 56126, Italy*

<sup>‡</sup>*Department of Physical and Chemical Sciences, University of L'Aquila, via Vetoio  
(Coppito 1), 67010 L'Aquila, Italy*

<sup>¶</sup>*National Institute for Nuclear Physics (INFN) Pisa Section, Largo Bruno Pontecorvo 3,  
56127 Pisa, Italy*

<sup>§</sup>*Department of Chemical Science and Technology, University of Roma Tor Vergata, via  
della Ricerca Scientifica, 00133 Roma, Italy*

E-mail: [isabella.daidone@univaq.it](mailto:isabella.daidone@univaq.it)

**Supporting Information Available**

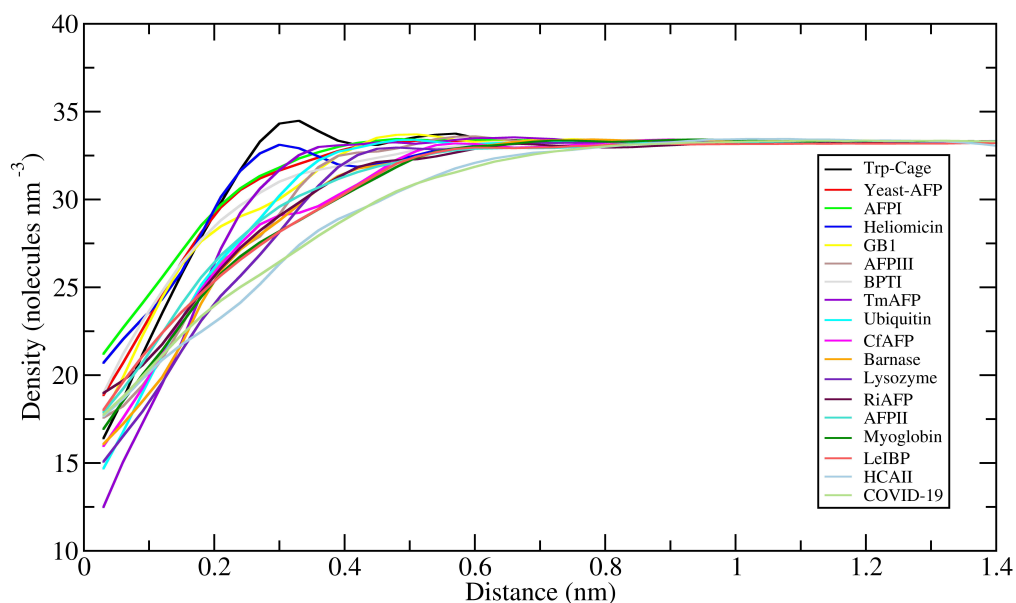

Figure S1: Layer density profile of the hydration SPC molecules as a function of the distance from the protein ellipsoid surface calculated for the eighteen proteins: Trp-cage (black), Yeast-AFP (red), AFPI (green), Heliomicin (blue), GB1 (yellow), AFPIII (brown), BPTI (grey), TmAFP (violet), Ubiquitin (cyan), CfAFP (magenta), Barnase (orange), Lysozyme (indigo), RiAFP (maroon), AFPII (turquoise), Myoglobin (dark green), LEIBP (light red), HCAII (light blue), and COVID-19 (light green).

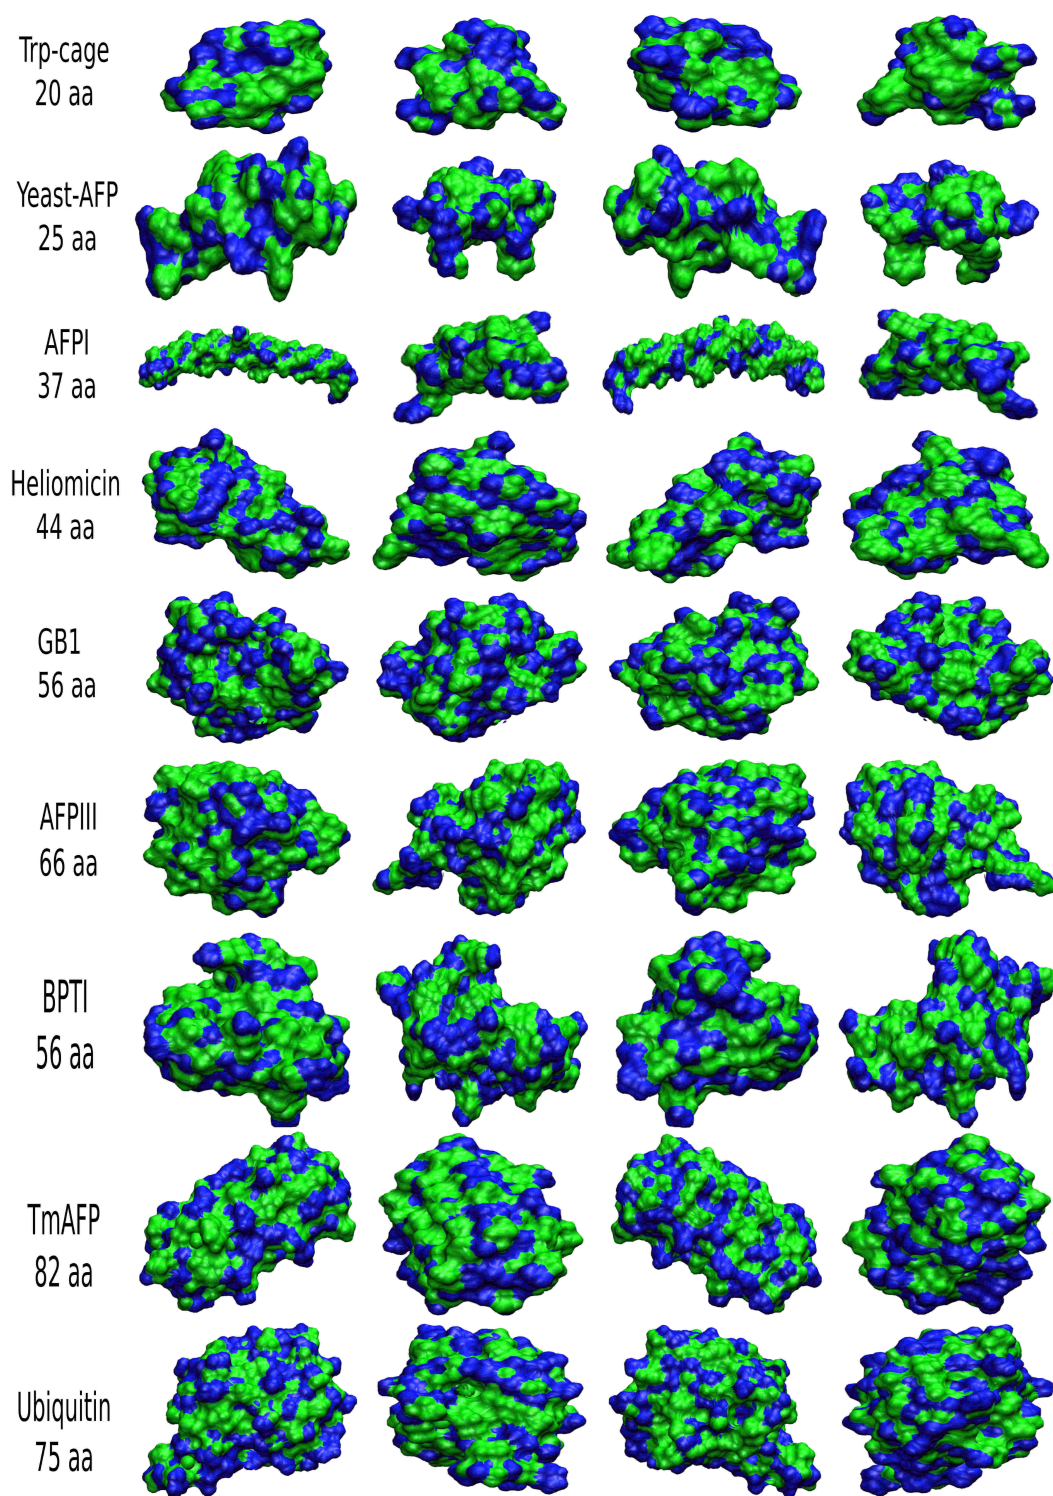

Figure S2: Hydrophobic (green) and hydrophilic (blue) atoms at the protein surface.



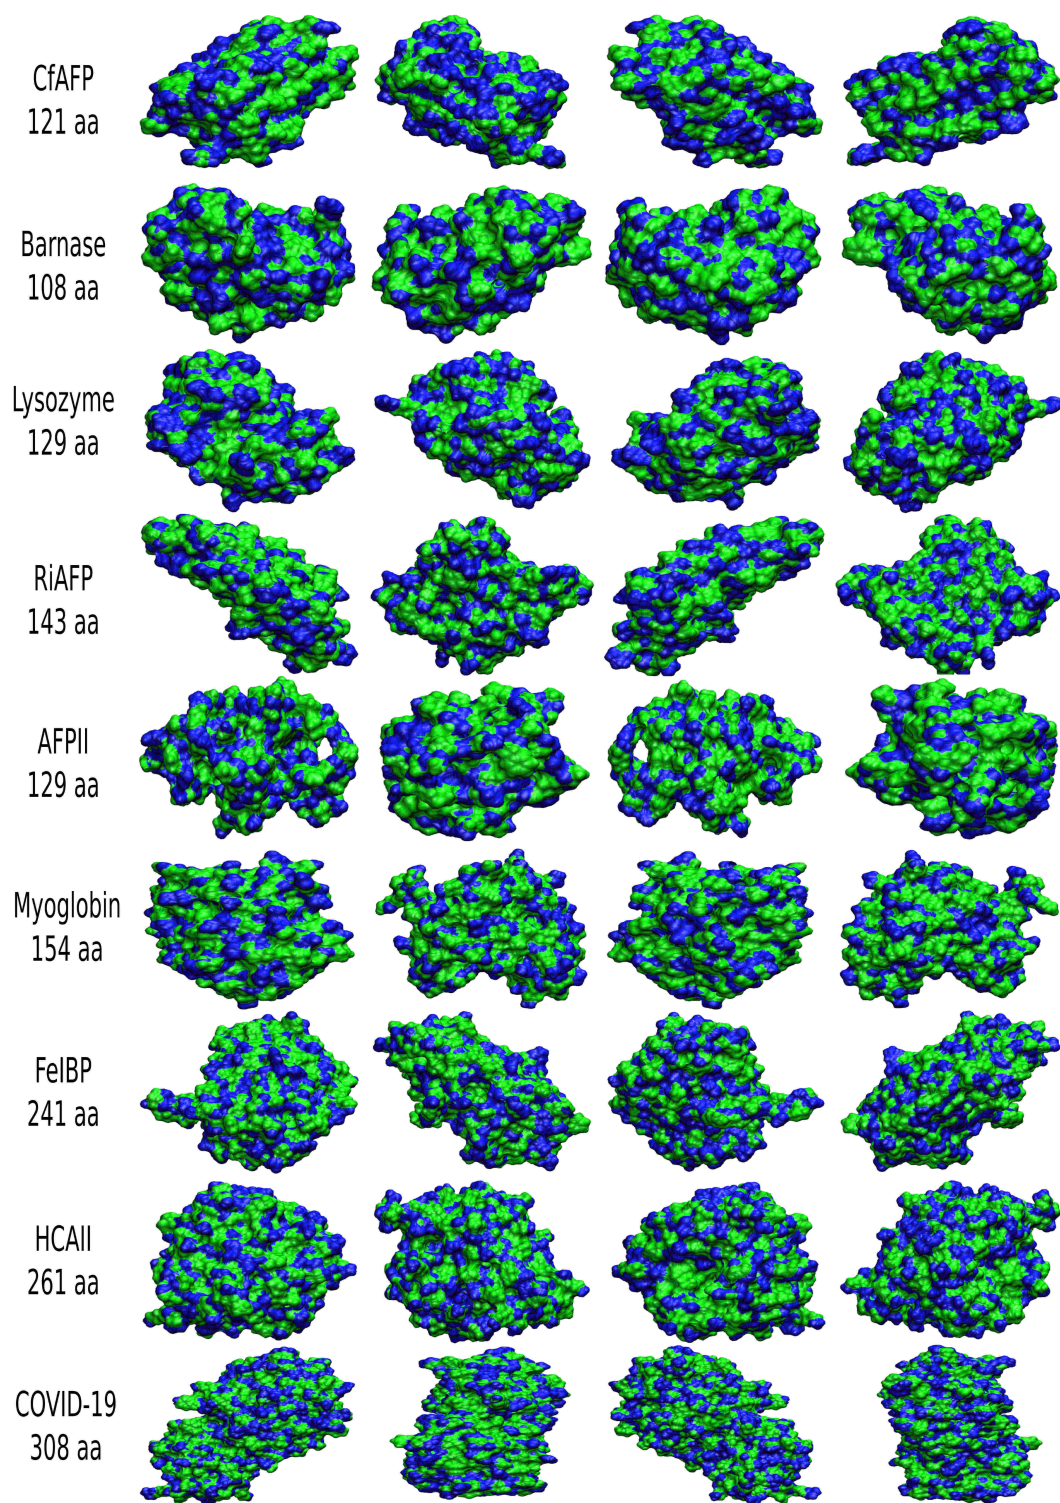

Figure S3: Hydrophobic (green) and hydrophilic (blue) atoms at the protein surface.
